# Supplementary material for: Bio-Priming with Bacillus Isolates Suppresses Seed Infection and Improves the Germination of Garden Peas in the Presence of Fusarium Strains
Source: MDPI journal article supplement (doi:10.3390/jof10050358), 2024-05-17
Supplement: s1 [file s1]

## Supplementary Material

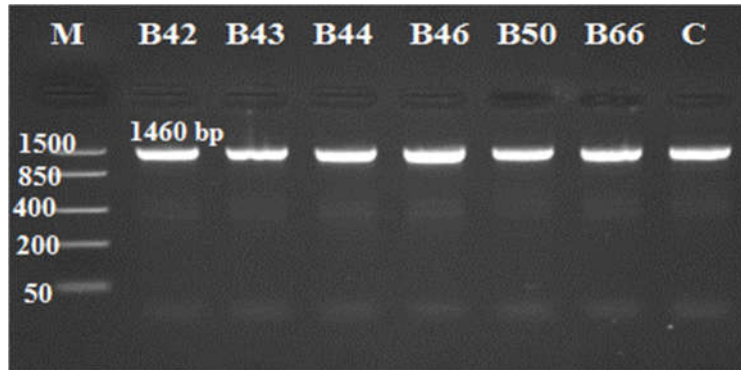

**Supplementary Materials Figure S1.** Polymerase chain reaction (PCR) screening for 16S rDNA gene (~1460 bp) in selected *Bacillus* spp. isolates (B42, B43, B44, B46, B50, B66). (M) PCR marker (Step Ladder, 50–1500 bp), (C) positive control (*B. subtilis* B32).

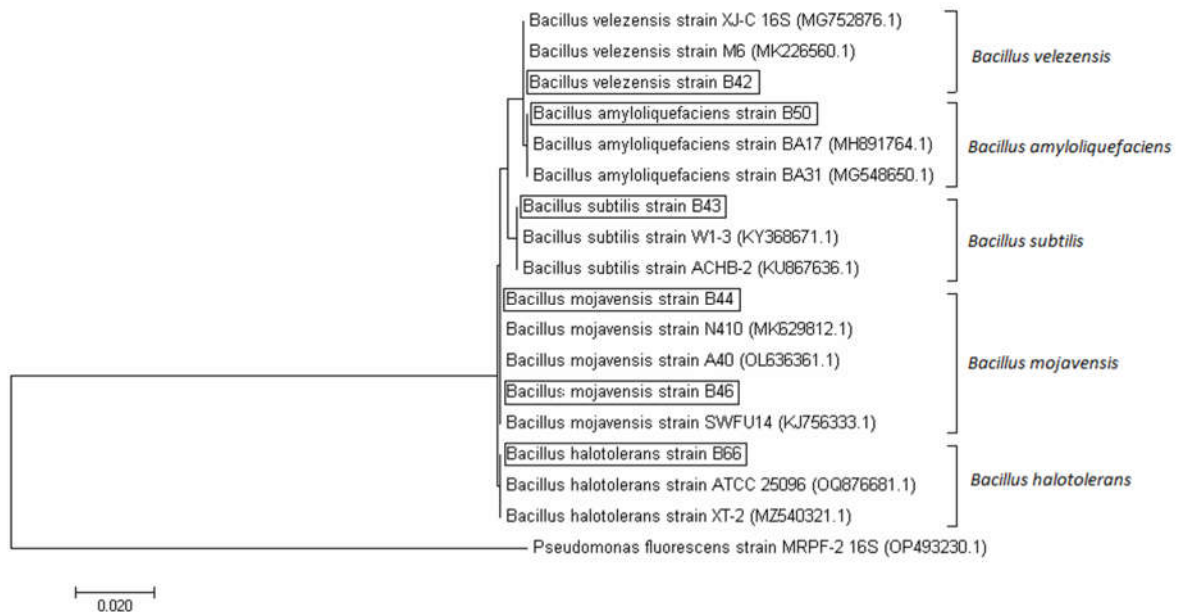

**Supplementary Materials Figure S2.** Phylogenetic tree based on the neighbor-joining (NJ) analysis of 16S rDNA gene sequences for selected *Bacillus* spp. isolates (*B. velezensis* B42; *B. subtilis* B43; *B. mojavensis* B44, B46; *B. amyloliquefaciens* B50; *B. halotolerans* B66) and related *Bacillus* spp. strains from the NCBI database.

**Supplementary Materials Table S1.** Primers and corresponding genes for PCR detection of lytic enzymes and cyclic lipopeptides

| Target Gene      | Primers | Sequence (5'-3')                      | Amplicon size (bp) | Reference |
|------------------|---------|---------------------------------------|--------------------|-----------|
| <i>ChiA</i>      | Qchi-f  | 5'-GATATCGACTGGGAGTTCCC-3'            | ~225               | [29]      |
|                  | Qchi-r  | 5'-CATAGAAGTCGTAGGTCATC-3'            |                    |           |
| Endoglucanase    | EN1F    | 5'-CCAGTAGCCAAGAATGGCCAGC-3'          | ~1311              | [30]      |
|                  | EN1R    | 5'-GGAATAATCGCCGCTTTGTGC-3'           |                    |           |
| <i>Sfp</i>       | Sfp-f   | 5'-ATGAAGATTTACGGAATTTA-3'            | ~675               | [29]      |
|                  | Sfp-r   | 5'-TTATAAAAGCTCTTCGTACG-3'            |                    |           |
| <i>BamC</i>      | Bacc1-f | 5'-GAAGGACACGGAGAGAGTC-3'             | ~875               | [29]      |
|                  | Bacc1-r | 5'-CGTGATGACTGTTCATGCT-3'             |                    |           |
| <i>ItuA-ItuB</i> | ITUP1-F | 5'-AGCTTAGGGAACAATTGTCATCGGGGCTTC-3'  | ~2000              | [27]      |
|                  | ITUP1-R | 5'-TCAGATAGGCCGCCATATCGGAATGATTTCG-3' |                    |           |
| <i>FenD</i>      | FenD1-f | 5'-TTTGGCAGCAGGAGAAGTTT-3'            | ~964               | [29]      |
|                  | FenD1-r | 5'-GCTGTCCGTTCTGCTTTTTC-3'            |                    |           |

*ChiA*, endoglucanase, *Sfp*, *BamC*, *ItuA-ItuB*, and *FenD*: Genes encoding for chitinase, endoglucanase, surfactin, bacillomycin D, parts of the genes *ituA* and *ituB* and intergenic sequences between them, and fengycin, respectively.

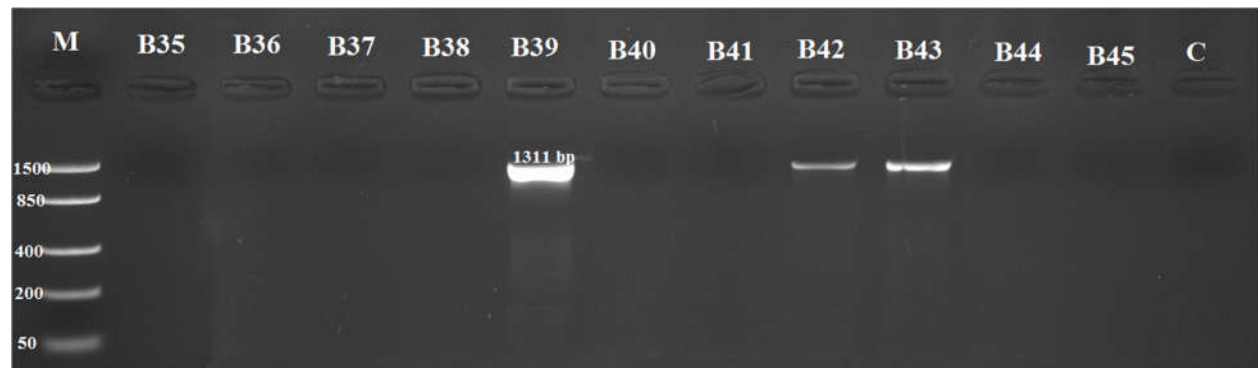

**Supplementary Materials Figure S3.** Polymerase chain reaction (PCR) screening for endoglucanase biosynthetic gene (~1311 bp) in *Bacillus* spp. isolates (B35-B45). (M) PCR marker (Step Ladder, 50–1500 bp), (C) negative control.

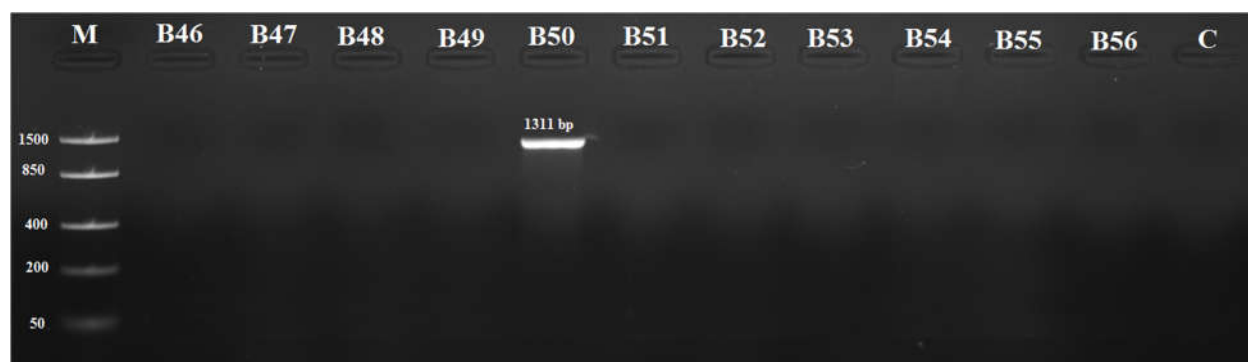

**Supplementary Materials Figure S4.** Polymerase chain reaction (PCR) screening for endoglucanase biosynthetic gene (~1311 bp) in *Bacillus* spp. isolates (B46–B56). (M) PCR marker (Step Ladder, 50–1500 bp), (C) negative control.

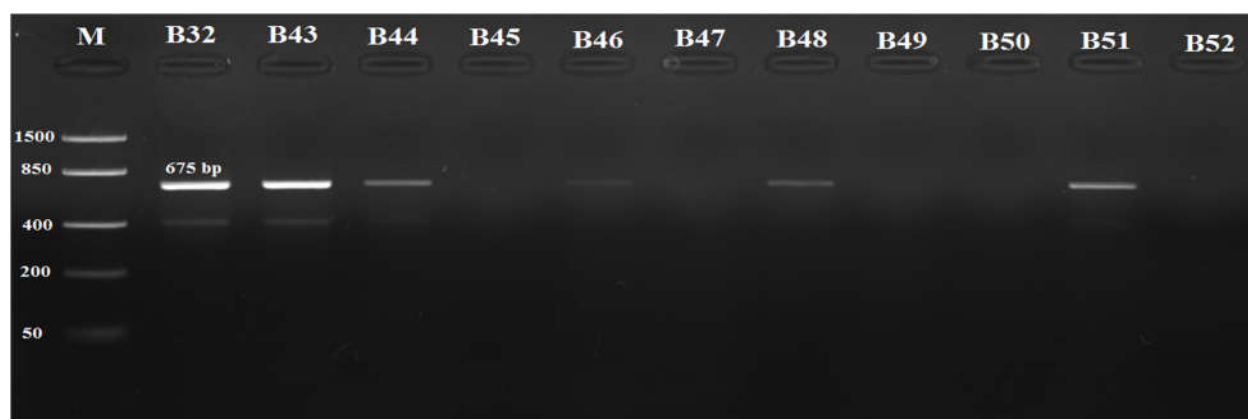

**Supplementary Materials Figure S5.** Polymerase chain reaction (PCR) screening for surfactin biosynthetic gene (~675 bp) in *Bacillus* spp. isolates (B43–B52). (M) PCR marker (Step Ladder, 50–1500 bp), (B32) positive control, (C) negative control.

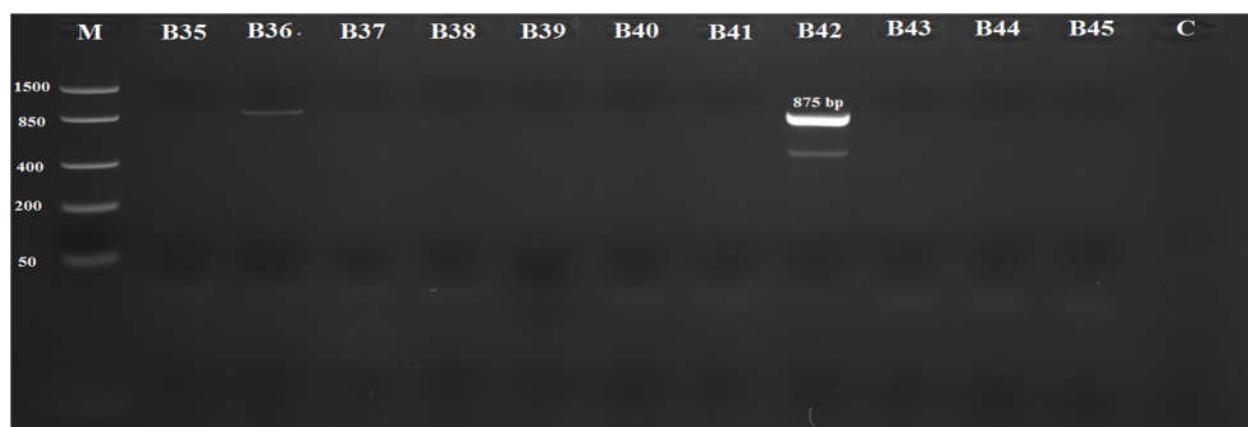

**Supplementary Materials Figure S6.** Polymerase chain reaction (PCR) screening for bacillomycin biosynthetic gene (~875 bp) in *Bacillus* spp. isolates (B35–B45). (M) PCR marker (Step Ladder, 50–1500 bp), (C) negative control.

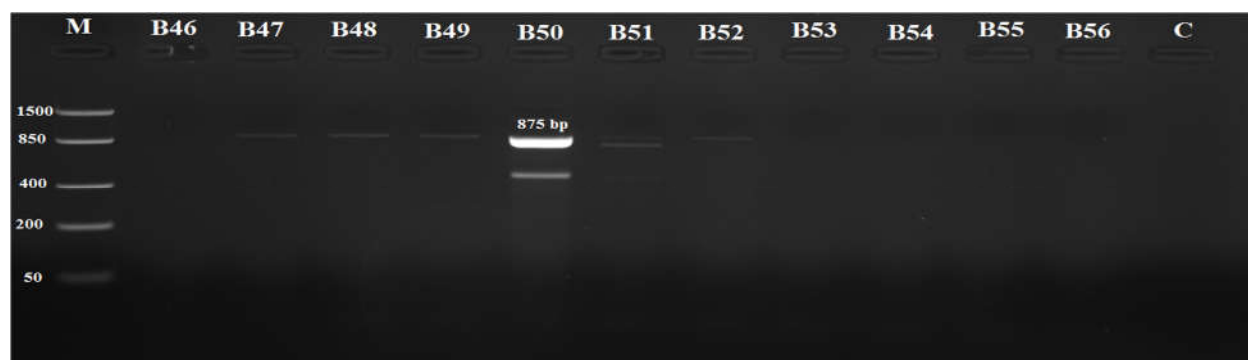

**Supplementary Materials Figure S7.** Polymerase chain reaction (PCR) screening for bacillomycin biosynthetic gene (~875 bp) in *Bacillus* spp. isolates (B46–B56). (M) PCR marker (Step Ladder, 50–1500 bp), (C) negative control.

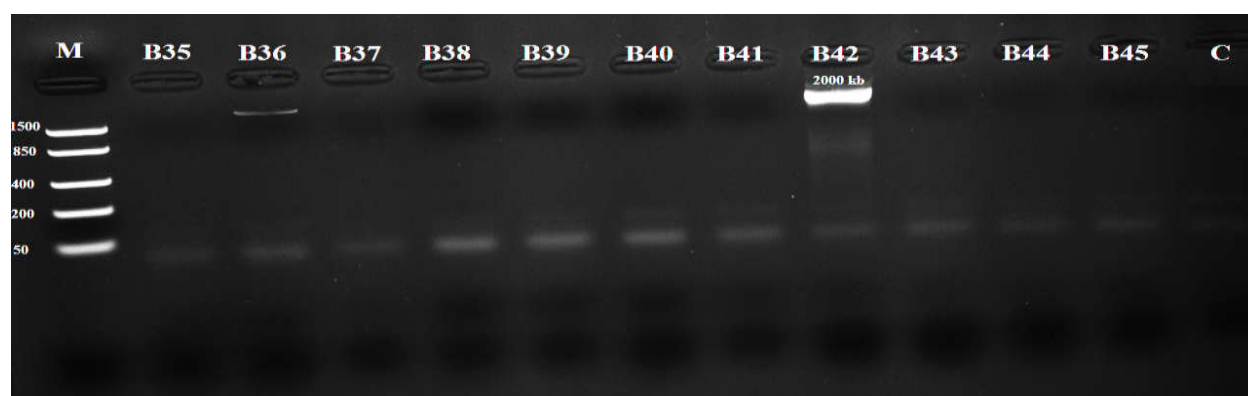

**Supplementary Materials Figure S8.** Polymerase chain reaction (PCR) screening for iturin biosynthetic gene (~2000 bp) in *Bacillus* spp. isolates (B35–B45). (M) PCR marker (Step Ladder, 50–1500 bp), (C) negative control.

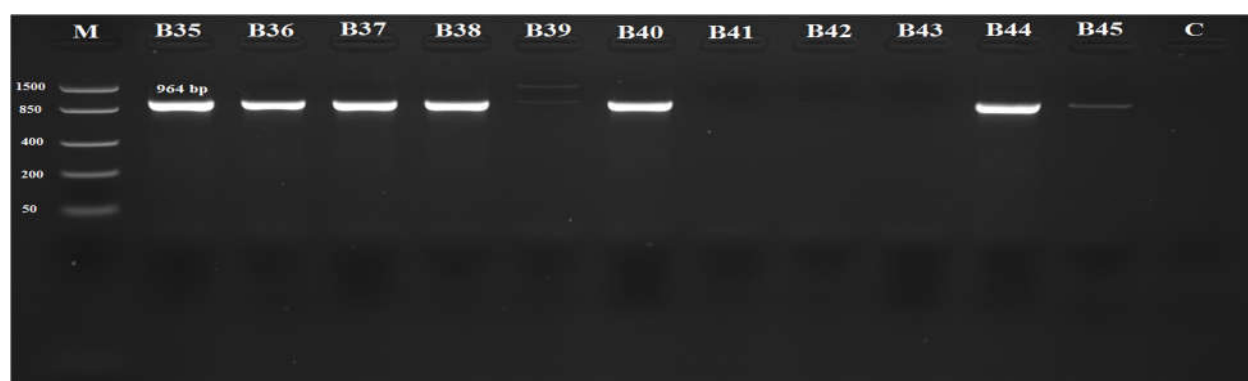

**Supplementary Materials Figure S9.** Polymerase chain reaction (PCR) screening for fengycin biosynthetic gene (~964 bp) in *Bacillus* spp. isolates (B35–B45). (M) PCR marker (Step Ladder, 50–1500 bp), (C) negative control.

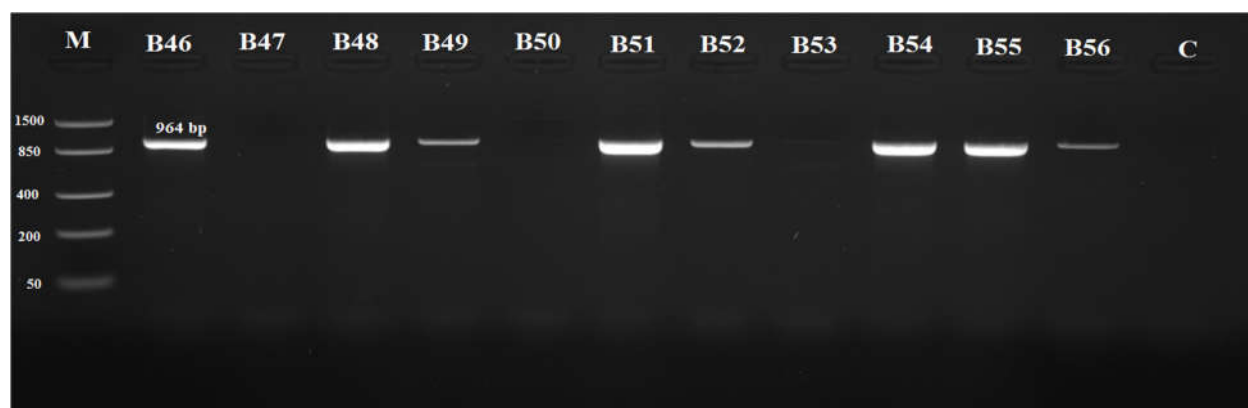

**Supplementary Materials Figure S10.** Polymerase chain reaction (PCR) screening for fengycin biosynthetic gene (~964 bp) in *Bacillus* spp. isolates (B46–B56). (M) PCR marker (Step Ladder, 50–1500 bp), (C) negative control.
